# Supplementary material for: Molecular Characterization of Blastocystis sp. in Camelus bactrianus in Northwestern China
Source: MDPI journal article supplement (doi:10.3390/ani11113016), 2021-10-20
Supplement: s1 [file s1]

# Molecular Characterization of *Blastocystis* sp. in *Camelus bactrianus* in Northwestern China

Xin Yang <sup>1,†</sup>, Yunhui Li <sup>1,†</sup>, Yuxin Wang <sup>1,†</sup>, Junwei Wang <sup>1</sup>, Peng Lai <sup>1</sup>, Yuan Li <sup>1</sup>, Junke Song <sup>1</sup>, Meng Qi <sup>2,\*</sup> and Guanghui Zhao <sup>1,\*</sup>

<sup>1</sup> College of Veterinary Medicine, Northwest A&F University, Yangling 712100, China; xinyang@nwfau.edu.cn (X.Y.); yhlivet@163.com (Y.L.); 2019@nwfau.edu.cn (Y.W.); w13186039897@163.com (J.W.); L1593414756@nwfau.edu.cn (P.L.); Liyy0915@nwfau.edu.cn (Y.L.); sjk7998@163.com (J.S.)

<sup>2</sup> College of Animal Science, Tarim University, Alar 843300, China

\* Correspondence: qimengdz@163.com (M.Q.); zgh083@nwsuaf.edu.cn (G.Z.)

† These authors contributed to the research equally.

**Table S1.** Variations in the SSU rRNA nucleotide sequences among the potentially novel subtype of *Blastocystis* sp. from *Camelus bactrianus* in the present study.

| Nucleotide positions and substitutions | 294      | JC-B16   | JC-B8    | BYHT31   | JC-B7    | JC-C7    | BYHT13   | MQ-C5    | 295      | SHT19    | Sr9      | SHT2     | Sr1      | MQ-B11D  |
|----------------------------------------|----------|----------|----------|----------|----------|----------|----------|----------|----------|----------|----------|----------|----------|----------|
| 22                                     | -        | -        | -        | -        | -        | -        | -        | -        | C        | -        | -        | -        | -        | -        |
| 29                                     | T        | T        | T        | T        | T        | T        | T        | C        | T        | T        | T        | T        | T        | T        |
| 45                                     | C        | C        | C        | C        | C        | C        | C        | C        | C        | C        | C        | C        | C        | G        |
| 95                                     | C        | C        | C        | C        | C        | C        | C        | C        | C        | C        | C        | C        | C        | T        |
| 130                                    | C        | C        | C        | C        | C        | C        | C        | C        | C        | C        | C        | C        | T        | T        |
| 151                                    | A        | A        | A        | A        | A        | G        | A        | A        | A        | A        | A        | A        | A        | A        |
| 155                                    | A        | G        | A        | A        | A        | A        | A        | A        | A        | A        | A        | A        | A        | A        |
| 165                                    | A        | A        | A        | A        | T        | A        | A        | A        | A        | A        | A        | A        | A        | A        |
| 170                                    | T        | T        | T        | T        | T        | T        | T        | T        | T        | T        | T        | T        | T        | A        |
| 186                                    | C        | C        | C        | C        | C        | C        | C        | C        | C        | C        | C        | C        | C        | A        |
| 195                                    | T        | T        | T        | T        | T        | T        | T        | T        | T        | T        | T        | T        | T        | G        |
| 239                                    | C        | C        | C        | C        | C        | C        | C        | C        | C        | C        | C        | C        | C        | T        |
| 281                                    | A        | A        | A        | A        | A        | A        | A        | C        | A        | A        | A        | A        | A        | A        |
| 311                                    | A        | A        | A        | T        | A        | A        | A        | A        | A        | A        | A        | A        | A        | A        |
| 322                                    | T        | T        | T        | T        | T        | T        | T        | T        | T        | T        | T        | T        | T        | G        |
| 342                                    | A        | A        | A        | A        | A        | A        | A        | A        | A        | A        | G        | A        | A        | A        |
| 344                                    | T        | T        | T        | T        | T        | T        | T        | T        | T        | G        | T        | T        | T        | T        |
| 354                                    | T        | A        | A        | T        | T        | T        | T        | T        | T        | T        | T        | T        | T        | T        |
| 358                                    | G        | C        | C        | G        | G        | G        | G        | G        | G        | G        | G        | G        | G        | G        |
| 359                                    | A        | T        | T        | A        | A        | A        | A        | A        | A        | A        | A        | A        | A        | A        |
| 360                                    | G        | C        | C        | G        | G        | G        | G        | G        | G        | G        | G        | G        | G        | G        |
| 363                                    | G        | T        | T        | G        | G        | G        | G        | G        | G        | G        | G        | G        | G        | G        |
| 367                                    | G        | A        | A        | G        | G        | G        | G        | G        | G        | G        | G        | G        | G        | G        |
| 378                                    | T        | T        | T        | T        | T        | T        | T        | T        | T        | T        | T        | T        | T        | C        |
| 380                                    | C        | C        | C        | C        | C        | C        | C        | C        | C        | C        | C        | C        | C        | -        |
| 381                                    | A        | A        | A        | A        | A        | A        | A        | A        | A        | A        | A        | A        | A        | -        |
| 383                                    | T        | T        | T        | T        | T        | T        | T        | T        | T        | T        | T        | T        | T        | A        |
| 390                                    | A        | A        | A        | A        | A        | A        | A        | A        | A        | A        | A        | A        | A        | T        |
| 392                                    | G        | T        | T        | A        | A        | A        | A        | G        | G        | G        | G        | G        | A        | G        |
| 393                                    | A        | A        | A        | G        | A        | A        | A        | A        | A        | A        | A        | A        | A        | A        |
| 395                                    | T        | A        | A        | T        | T        | T        | T        | T        | T        | T        | T        | T        | T        | T        |
| 396                                    | -        | T        | -        | -        | -        | -        | -        | -        | -        | -        | -        | -        | -        | -        |
| 397                                    | -        | A        | A        | -        | -        | -        | -        | -        | -        | -        | -        | -        | -        | -        |
| 398                                    | G        | G        | G        | G        | G        | G        | G        | G        | G        | G        | G        | G        | G        | -        |
| 399                                    | T        | T        | T        | T        | T        | T        | T        | T        | T        | T        | T        | G        | T        | T        |
| 400                                    | T        | T        | C        | T        | T        | T        | T        | T        | T        | T        | T        | T        | T        | C        |
| 403                                    | G        | G        | G        | G        | G        | G        | G        | G        | G        | G        | G        | G        | G        | C        |
| GenBank No.                            | MZ356453 | MZ356444 | MZ356415 | MZ356447 | MZ356443 | MZ356442 | MZ356449 | MZ356441 | MZ356455 | MZ356452 | MZ356451 | MZ356450 | MZ356445 | MZ356457 |
